# Supplementary material
Source: publisher figshare collection journal article supplement (https://frontiersin.figshare.com/ndownloader/files/13787510)
Supplement: Supplementary file 1 [file 13787510]

# Appendix

| Author at Sheffield | Paper title | Altmetric.com Badge and metrics | DOI |
| --- | --- | --- | --- |
| Geddes, Andrew P | Migration and global environmental change | <https://www.altmetric.com/details/2623765> | 10.1016/j.gloenvcha.2011.10.005 |
| No Sheffield Authors listed in paper | A Survey Method for Characterizing Daily Life Experience: The Day Reconstruction Method | <https://www.altmetric.com/details/424205> | 10.1126/science.1103572 |
| Holdsworth, Michelle - one of 100s in the data group - not an author | National, regional, and global trends in body-mass index since 1980: systematic analysis of health examination surveys and epidemiological studies with 960 country-years and 9·1 million participants | <https://www.altmetric.com/details/219394> | 10.1016/s0140-6736(10)62037-5 |
| Peasgood, Tessa, 2008 | Do we really know what makes us happy? A review of the economic literature on the factors associated with subjective well-being | <https://www.altmetric.com/details/2743484> | 10.1016/j.joep.2007.09.001 |
| Morgan, Christopher W (Wyn) - was at University of Nottingham, now University of Sheffield | Food price volatility | <https://www.altmetric.com/details/1430954> | 10.1098/rstb.2010.0139 |
| No Sheffield Authors listed in paper | Effects of Nurse Home-Visiting on Maternal Life Course and Child Development: Age 6 Follow-Up Results of a Randomized Trial | <https://www.altmetric.com/details/15059569> | 10.1542/peds.2004-0962 |
| Coleman, Robert E - one of very many authors | Alpha emitter radium-223 and survival in metastatic prostate cancer. | <https://www.altmetric.com/details/1631816> | 10.1056/nejmoa1213755 |
| Brazier, John E; Ara, Roberta M | Deriving an Algorithm to Convert the Eight Mean SF-36 Dimension Scores into a Mean EQ-5D Preference-Based Score from Published Studies (Where Patient Level Data Are Not Available) | <https://www.altmetric.com/details/6235444> | 10.1111/j.1524-4733.2008.00352.x |
|  | Effects of Home Visits by Paraprofessionals and by Nurses: Age 4 Follow-Up Results of a Randomized Trial | <https://www.altmetric.com/details/2832841> | 10.1542/peds.2004-0961 |
| Moreno Serra, Rodrigo A - was at Imperial, now University of Sheffield | Does progress towards universal health coverage improve population health? | <https://www.altmetric.com/details/933453> | 10.1016/s0140-6736(12)61039-3 |
| No Sheffield Authors listed in paper | Effects of Sure Start local programmes on children and families: early findings from a quasi-experimental, cross sectional study | <https://www.altmetric.com/details/2622769> | 10.1136/bmj.38853.451748.2f |
| Lomas, Mark R; Woodward, Frank I - two of very many authors | Trends in the sources and sinks of carbon dioxide | <https://www.altmetric.com/details/746099> | 10.1038/ngeo689 |
| McIntoch, Steven - was at London School of Economics, now Sheffield | The Returns to Academic and Vocational Qualifications in Britain | <https://www.altmetric.com/details/5513350> | 10.1111/1467-8586.00152 |
| Storey, Robert F | Ticagrelor versus clopidogrel in patients with acute coronary syndromes. | <https://www.altmetric.com/details/478438> | 10.1056/nejmoa0904327 |
| Bell, Gillian; Kinghorn, George | Repeat infection with gonorrhoea in Sheffield, UK: predictable and preventable? | <https://www.altmetric.com/details/814700> | 10.1136/sextrans-2012-050495 |
| Weich, Scott R - was at University of Warwick, now Sheffield | The Warwick-Edinburgh Mental Well-being Scale (WEMWBS): development and UK validation | <https://www.altmetric.com/details/2411893> | 10.1186/1477-7525-5-63 |
| Freckleton, Robert P; Gaston, Kevin J | PRIORITY CONTRIBUTION: Future novel threats and opportunities facing UK biodiversity identified by horizon scanning | <https://www.altmetric.com/details/5315378> | 10.1111/j.1365-2664.2008.01474.x |
| Rushton, Simon | Global health security: the wider lessons from the west African Ebola virus disease epidemic | <https://www.altmetric.com/details/3976174> | 10.1016/s0140-6736(15)60858-3 |
| Sheeran, Paschal J; Webb, Thomas L | Does changing behavioral intentions engender behavior change? A meta-analysis of the experimental evidence. | <https://www.altmetric.com/details/1066029> | 10.1037/0033-2909.132.2.249 |
| Prescott, Anthony J (Tony) - Prescott is cited in this article by Reitz | The equity risk premium a solution | <https://www.altmetric.com/details/262958> | 10.1016/0304-3932(88)90172-9 |
| Brazier, John E | Probabilistic sensitivity analysis for NICE technology assessment: not an optional extra | <https://www.altmetric.com/details/2411966> | 10.1002/hec.985 |
